# Supplementary material for: Drug therapy for alcohol dependence in primary care in the UK: A Clinical Practice Research Datalink study
Source: PLoS One. 2017 Mar 20;12(3):e0173272. doi: 10.1371/journal.pone.0173272 (PMC5358741; doi:10.1371/journal.pone.0173272)
Supplement: S2 Table — (DOC) [file pone.0173272.s002.doc]

S2 Table: STROBE Statement Checklist

|  | Item No | Recommendation | Where Evidenced |
| --- | --- | --- | --- |
| **Title and abstract** | 1 | (*a*) Indicate the study’s design with a commonly used term in the title or the abstract | Title |
| (*b*) Provide in the abstract an informative and balanced summary of what was done and what was found | Abstract |
| Introduction | | |  |
| Background/rationale | 2 | Explain the scientific background and rationale for the investigation being reported | Introduction |
| Objectives | 3 | State specific objectives, including any prespecified hypotheses | Introduction P3 |
| Methods | | |  |
| Study design | 4 | Present key elements of study design early in the paper | Methods P1 P2 & P3 |
| Setting | 5 | Describe the setting, locations, and relevant dates, including periods of recruitment, exposure, follow-up, and data collection | Methods P1 P2 P3 P4 P5 & P6 |
| Participants | 6 | (*a*) Give the eligibility criteria, and the sources and methods of selection of participants. Describe methods of follow-up | Methods P2 P3 & P4 |
| (*b*)For matched studies, give matching criteria and number of exposed and unexposed | N/A |
| Variables | 7 | Clearly define all outcomes, exposures, predictors, potential confounders, and effect modifiers. Give diagnostic criteria, if applicable | Methods P4 P5 & P6 |
| Data sources/ measurement | 8* | For each variable of interest, give sources of data and details of methods of assessment (measurement). Describe comparability of assessment methods if there is more than one group | Methods P1 P2 P3 P4 P5 & P6 |
| Bias | 9 | Describe any efforts to address potential sources of bias | Methods P6 |
| Study size | 10 | Explain how the study size was arrived at | Methods P2 & P3 |
| Quantitative variables | 11 | Explain how quantitative variables were handled in the analyses. If applicable, describe which groupings were chosen and why | Methods P4 P5 & P6 |
| Statistical methods | 12 | (*a*) Describe all statistical methods, including those used to control for confounding | Methods P5 & P6 |
| (*b*) Describe any methods used to examine subgroups and interactions | Methods P5 & P6 |
| (*c*) Explain how missing data were addressed | N/A |
| (*d*) If applicable, explain how loss to follow-up was addressed | N/A |
| (*e*) Describe any sensitivity analyses | N/A |
| Results | | |  |
| Participants | 13* | (a) Report numbers of individuals at each stage of study—eg numbers potentially eligible, examined for eligibility, confirmed eligible, included in the study, completing follow-up, and analysed | Methods P1;  Results P1 |
| (b) Give reasons for non-participation at each stage | N/A |
| (c) Consider use of a flow diagram | N/A |
| Descriptive data | 14* | (a) Give characteristics of study participants (eg demographic, clinical, social) and information on exposures and potential confounders | Results P1;  Table 1 |
| (b) Indicate number of participants with missing data for each variable of interest | N/A |
| (c) Summarise follow-up time (eg, average and total amount) | Methods P4 |
| Outcome data | 15* | Report numbers of outcome events or summary measures over time | Results P2 & P3;  Table 2 |
| Main results | 16 | (*a*) Give unadjusted estimates and, if applicable, confounder-adjusted estimates and their precision (eg, 95% confidence interval). Make clear which confounders were adjusted for and why they were included | Results P4 P5 P6 & P7; Table 3 |
| (*b*) Report category boundaries when continuous variables were categorized | Results P4 P5 – as described in Methods P5 |
| (c) If relevant, consider translating estimates of relative risk into absolute risk for a meaningful time period | N/A |
| Other analyses | 17 | Report other analyses done—eg analyses of subgroups and interactions, and sensitivity analyses | N/A |
| Discussion | | |  |
| Key results | 18 | Summarise key results with reference to study objectives | Discussion, P1 |
| Limitations | 19 | Discuss limitations of the study, taking into account sources of potential bias or imprecision. Discuss both direction and magnitude of any potential bias | Discussion, P2 |
| Interpretation | 20 | Give a cautious overall interpretation of results considering objectives, limitations, multiplicity of analyses, results from similar studies, and other relevant evidence | Discussion P3 &P4 |
| Generalisability | 21 | Discuss the generalisability (external validity) of the study results | Discussion P4 |
| Other information | | |  |
| Funding | 22 | Give the source of funding and the role of the funders for the present study and, if applicable, for the original study on which the present article is based | Footnote, Funding |

*Give information separately for exposed and unexposed groups.

**Note:** An Explanation and Elaboration article discusses each checklist item and gives methodological background and published examples of transparent reporting. The STROBE checklist is best used in conjunction with this article (freely available on the Web sites of PLoS Medicine at http://www.plosmedicine.org/, Annals of Internal Medicine at http://www.annals.org/, and Epidemiology at http://www.epidem.com/). Information on the STROBE Initiative is available at http://www.strobe-statement.org.
